# Supplementary material for: Poor soil as a fertile breeding ground: the role of historical agricultural specialization for the persistence of regional differences in crafts
Source: Springer Nature journal article supplement (doi:10.1007/s00168-022-01137-7), 2022-05-18
Supplement: MOESM1 [file 168_2022_1137_MOESM1_ESM.docx]

**Online Appendix**

**Fig. A1**


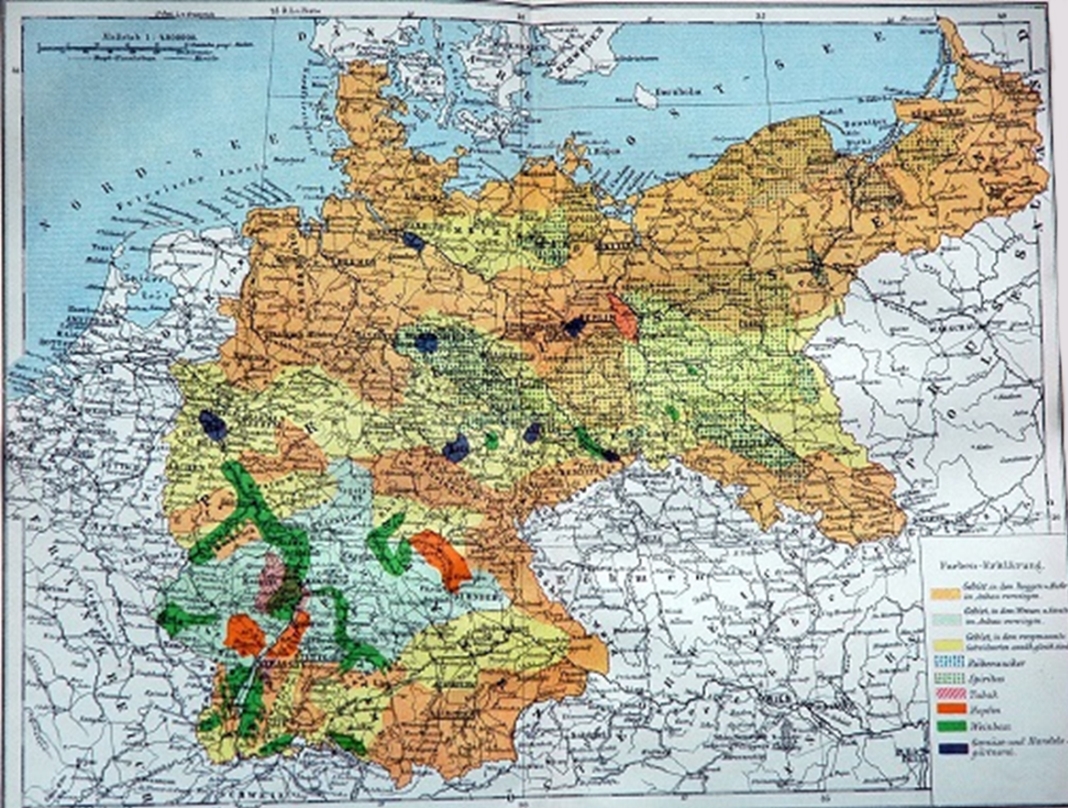


Source: „Karte der Landwirtschaft im Deutschen Reiche“, in: Brockhaus' Konversations-Lexikon,
14. Aufl., 1894-1897.

**Fig. A2: Soil Quality Rating**


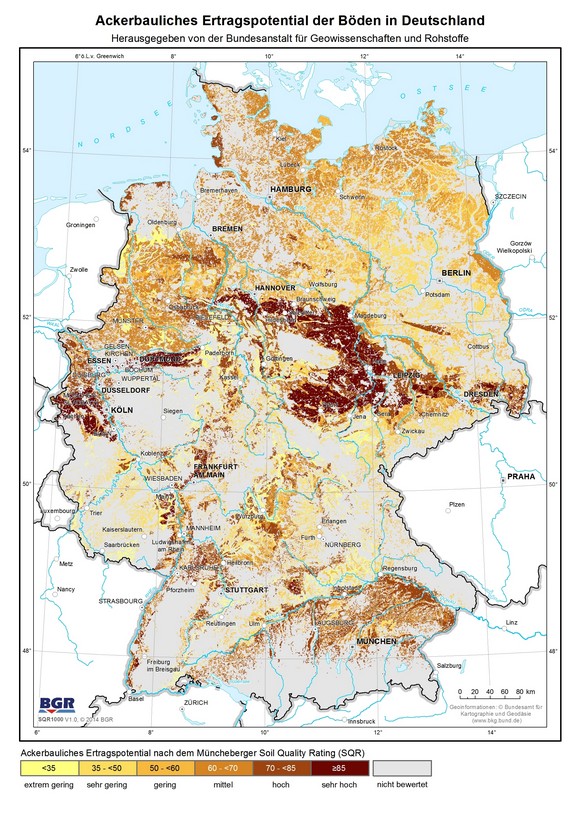


Source: Bundesanstalt für Geowissenschaft und Rohstoffe / Federal Institute for Geosciences and Natural Resources

Figure A3: Types of Soil


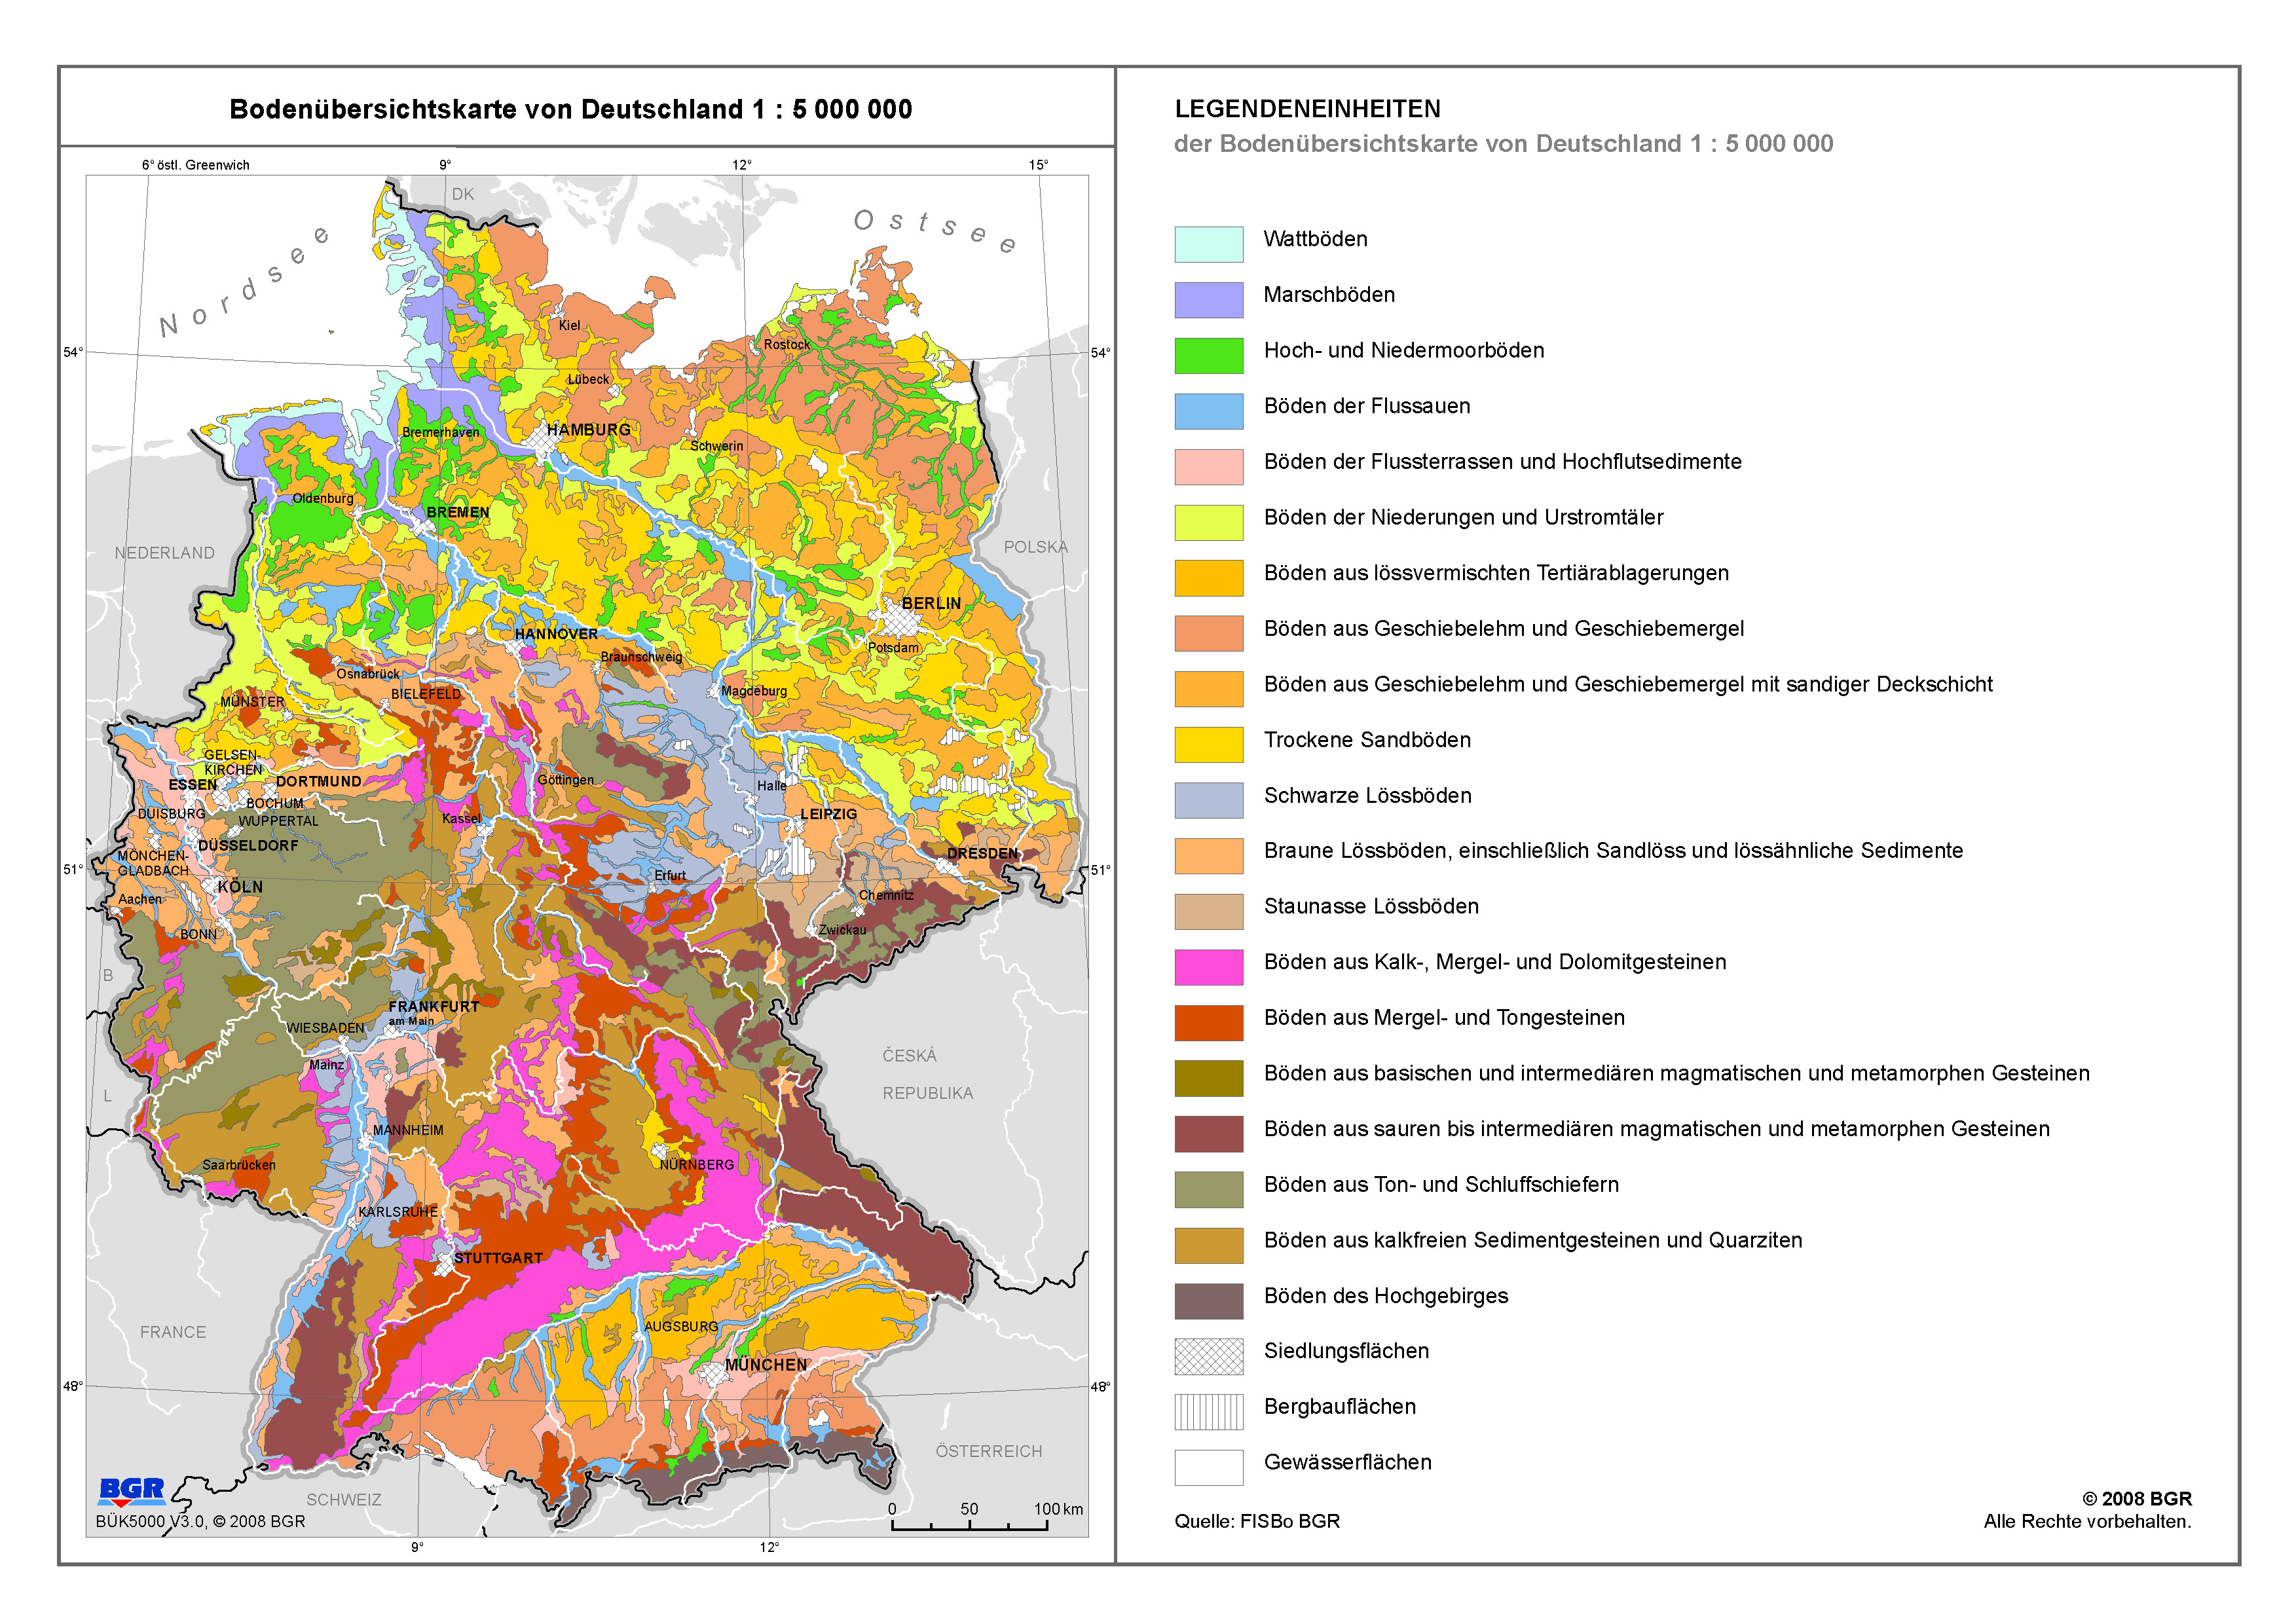


Source: Bundesanstalt für Geowissenschaft und Rohstoffe / Federal Institute for Geosciences and Natural Resources

Notes: The oat and rye agricultural areas are mostly characterized by rocky and clayey soils (Bavaria, Saxonia, Thüringia, Baden-Württemberg) as well as swampy soils (north-west), an indicator of lower agricultural productivity.

Table A1: OLS Regressions (additional robustness specifications)

|  | | (1) | (2) | | (3) | | (4) |  | | (5) | | (6) | (7) | | (8) | | |
| --- | --- | --- | --- | --- | --- | --- | --- | --- | --- | --- | --- | --- | --- | --- | --- | --- | --- |
|  | | **1904 to 1931** | | | | | |  | | **1931 to 2013** | | | | | | | |
| Log of crafts density, 1904 | | 0.244** | 0.214** | | 0.229** | | 0.297** |  | |  | |  |  | |  | | |
|  | | (0.000) | (0.000) | | (0.000) | | (0.000) |  | |  | |  |  | |  | | |
| Log of industry employment share, 1907 | |  | -0.095** | | -0.091** | |  |  | |  | | -0.302** | -0.353** | |  | | |
|  | |  | (0.007) | | (0.021) | |  |  | |  | | (0.000) | (0.000) | |  | | |
| Log of min. distance to coalfield | |  | 0.009* | | 0.029** | |  |  | |  | | -0.018** | -0.005 | |  | | |
|  | |  | (0.051) | | (0.013) | |  |  | |  | | (0.005) | (0.563) | |  | | |
| Log of crafts density, 1931 | |  |  | |  | |  |  | | 0.366** | | 0.319** | 0.287** | | 0.384** | | |
|  | |  |  | |  | |  |  | | (0.000) | | (0.001) | (0.007) | | (0.000) | | |
| *Controls* |  | |  |  | |  | | |  |  |  | | |  | |  |
|  |  | |  |  | |  | | |  |  |  | | |  | |  |
| Historical states | Yes | | Yes | Yes | | Yes | | |  | Yes | Yes | | | Yes | | Yes |
| Current states | No | | No | Yes | | Yes | | |  | No | No | | | Yes | | Yes |
|  |  | |  |  | |  | | |  |  |  | | |  | |  |
| _cons | | 2.313** | 2.211** | | 1.971** | | 2.196** |  | | 2.903** | | 2.860** | 2.799** | | 2.858** | | |
|  | | (0.000) | (0.000) | | (0.000) | | (0.000) |  | | (0.000) | | (0.000) | (0.000) | | (0.000) | | |
| *N* | | 169 | 169 | | 169 | | 169 |  | | 169 | | 169 | 169 | | 169 | | |
| *R*2 | | 0.352 | 0.410 | | 0.598 | | 0.528 |  | | 0.203 | | 0.362 | 0.430 | | 0.276 | | |

Robust standard errors are presented in parentheses. * *p* < 0.10, ** *p* < 0.05, *** *p* < 0.01

For the years 1904 and 1931 we use crafts association memberships per 1,000 inhabitants as our main explanatory variable. For 2013, we use the number of crafts people per 1,000 inhabitants. The southern German region of Bavaria and Baden-Württemberg are dropped from the analysis as the crafts associations that were widespread in the North did not exist in the South.

Table A2: Spatial Regression Results

|  | (1) | (2) | (3) | (4) |  | (5) | (6) |
| --- | --- | --- | --- | --- | --- | --- | --- |
|  | **Dep. Var. ln_density_2013** | | | |  | **IV 1st stage** | **IV 2nd stage** |
|  |  |  |  |  |  |  |  |
| Log of crafts density, 1904 | 0.166** | 0.135** | 0.109* | 0.132** |  |  | .185** |
|  | (0.012) | (0.027) | (0.073) | (0.042) |  |  | (0.018) |
| Log of industry employment share, 1907 |  | -0.353** | -0.384** | -0.352** |  | -0.070* | -0.39*** |
|  |  | (0.000) | (0.000) | (0.000) |  | (0.072) | (0.000) |
| Log of min. distance to coalfield |  | 0.003 | -0.017** | 0.003 |  | 0.027** | -0.000 |
|  |  | (0.775) | (0.037) | (0.776) |  | (0.000) | (0.985) |
| Oats & rye agricultural region |  |  |  |  |  | 0.129** |  |
|  |  |  |  |  |  | (0.000) |  |
|  |  |  |  |  |  |  |  |
| State Controls | No | Yes | Yes | Yes |  | Yes | Yes |
| West Germany only | No | No | Yes | Yes |  | No | No |
|  |  |  |  |  |  |  |  |
|  |  |  |  |  |  |  |  |
| Constant | 3.998** | 3.486** | 3.352** | 3.491** |  | 2.436** | 3.423*** |
|  | (0.000) | (0.000) | (0.000) | (0.000) |  | (0.000) | (0.000) |
| W |  |  |  |  |  |  |  |
| Log of crafts density, 1904 |  |  |  | 0.03 |  |  |  |
|  |  |  |  | (0.914) |  |  |  |
| Log of crafts density, 2013 | -0.132** | -0.077* | 0.023 | -0.093 |  |  | -.0811* |
|  | (0.009) | (0.098) | (0.620) | (0.550) |  |  | 0.088 |
| Error term | 0.744** | 0.740** | 0.692** | 0.742** |  |  | 4.264*** |
|  | (0.004) | (0.005) | (0.025) | (0.005) |  |  | 0.004 |
| *N* | 169 | 169 | 116 | 169 |  | 169 | 169 |
| *R*2 | 0.28 | 0.43 | 0.40 | 0.43 |  | - | - |

Robust standard errors are presented in parentheses. * *p* < 0.10, ** *p* < 0.05, *** *p* < 0.01

For the years 1904 and 1926 we use crafts association memberships per 1,000 inhabitants as our main explanatory variable. For 2013, we use the number of crafts people per 1,000 inhabitants. The southern German region of Bavaria and Baden-Württemberg have been excluded as the crafts associations that were widespread in the North did not exist in the South.

An inverse distance weights matrix has been used.

Table A.3: List of historical and contemporary crafts trades

| **Crafts Association title 1895  *according to the Imperial Statistics Office*** | **Number of Businesses** | **English translation** | **Equivalent Crafts trade title 2021  *according to the Trade and Crafts Code*** | **Evaluation: Continuity in the type of work** | **Number of Businesses** |
| --- | --- | --- | --- | --- | --- |
| Barbiere | 2.25% | Hairdresser | Friseure | strong continuity | 9.59% |
| Friseure und Perrückenmacher | 0.20% | Hairdresser and wigmaker | Friseure | strong continuity |  |
| Bäcker | 10.85% | Baker | Bäcker | strong continuity | 1.71% |
| Bandagisten | 0.28% | Orthopedic technician | Orthopädiemechaniker | continuity | 0.26% |
| Böttcher | 1.21% | Cooper | Böttcher | continuity | 0.01% |
| Brauer | 0.97% | Brewer | Brauer und Mälzer | strong continuity | 0.12% |
| Brunnenmacher | 0.11% | Well-digger | Brunnenbauer | continuity | 0.08% |
| Buchbinder | 0.73% | Book-binder | Buchbinder | strong continuity | 0.08% |
| Bürsten-, Pinselmacher | 0.26% | Brush-maker | Bürsten- und Pinselmacher | strong continuity | 0.00% |
| Conditoren | 0.80% | Confectioner | Konditoren | strong continuity | 0.37% |
| Dachdecker | 1.17% | Roofer | Dachdecker | strong continuity | 2.45% |
| Drechsler | 0.60% | Turner | Drechsler (Elfenbeinschnitzer) und Holzspielzeugmacher | strong continuity | 0.09% |
| Drucker (Buchdruck) | 0.43% | Printer (letterpress) | Drucker | continuity | 0.14% |
| Drucker (Stein-, Zink-, Kupfer-, Stahl) | 0.09% | Lithographic printer | Flexographen | continuity | 0.02% |
| Farbendruck | 0.01% | Printer (chromotypography) | Siebdrucker | continuity | 0.05% |
| Färber | 0.21% | Dyer | Textilgestalter | continuity | 0.06% |
| Feilenhauer | 0.18% | File cutter | Gold- und Silberschmiede | strong continuity | 0.51% |
| Gold-, Silber- u. Arbeiter | 0.25% | Goldsmith and silversmith | Gold- und Silberschmiede | strong continuity |  |
| Gas-, Wasserleitungs-, u. Installateure | 0.11% | Gas and water pipe plumbers | Installateur und Heizungsbauer | continuity | 7.69% |
| Gelb- und Rothgießer | 0.13% | Yellow and red founder | Metall- und Glockengießer | continuity | 0.02% |
| Gießer; Zinn-, Zink-, Metall-Gießer | 0.08% | Founder; tin/ zinc/ metal founder | Metall- und Glockengießer | continuity |  |
| Glockengießer | 0.00% | Bell founder | Metall- und Glockengießer | continuity |  |
| Gerber | 0.46% | Tanner | Gerber | strong continuity | 0.00% |
| Glaser | 0.63% | Glazier | Glaser | strong continuity | 0.60% |
| Graveure | 0.06% | Engraver | Graveure | strong continuity | 0.07% |
| Graveure |  |  | Edelsteinschleifer und -graveure | strong continuity | 0.01% |
| Handschuhmacher | 0.06% | Glove maker | Handschuhmacher | strong continuity | 0.00% |
| Hutmacher | 0.16% | Hatter | Modisten | strong continuity | 0.02% |
| Kammmacher | 0.02% | Comb maker |  | obsolete |  |
| Klempner | 1.85% | Plumber | Klempner | continuity | 0.65% |
| Korbmacher | 1.62% | Basket maker | Korb- und Flechtwerkgestalter | strong continuity | 0.01% |
| Kürschner | 0.24% | Furrier | Kürschner | strong continuity | 0.04% |
| Kupferschmiede | 0.37% | Coppersmith |  | obsolte |  |
| Maler; Lackierer | 3.57% | Painter; Lacquerer | Maler und Lackierer | continuity | 6.14% |
| Maurer | 4.09% | Bricklayer | Maurer und Betonbauer | strong continuity | 5.91% |
|  |  |  | Gerüstbauer | strong continuity | 0.50% |
| Metzger | 7.38% | Butcher | Fleischer | strong continuity | 1.66% |
| Müller | 3.59% | Miller | Müller | strong continuity | 0.08% |
| Mühlenbauer | 0.11% | Millwright |  | obsolte |  |
| Musikinstrumentenmacher | 0.06% | Musical instrument maker | Metalblasinstrumentenmacher; Holzblasinstrumentenmacher; Zupfinstrumentenmacher; Klavier- und Cembalobauer; Handzuginstrumentenmacher; Geigenbauer | strong continuity | 0.03% |
| Posamentirer | 0.06% | Trimmings Manufacturer | Textilgestalter (Sticker, Weber, Klöppler, Posamentierer, Stricker) | continuity | 0.06% |
| Sattler, Riemer | 1.90% | Saddler | Sattler und Feintäschner | continuity | 0.22% |
| Schiffbauer | 0.06% | Shipwright | Boots- und Schiffbauer | continuity | 0.07% |
| Schleifer | 2.66% | Grinder | Metallschleifer und Metallpolierer | strong continuity | 0.00% |
| Drahtzieher für Eisen, Kupfer | 0.00% | Wire drawer for iron, copper | Metallbauer | strong continuity | 3.79% |
| Schlosser (Nicht-Spezialisten) | 2.03% | Locksmith (non specialist) | Metallbauer | strong continuity |  |
| Nadler | 0.03% | Wire drawer | Metallbauer | strong continuity |  |
| Nagelschmiede | 0.10% | Nailsmith | Metallbauer | strong continuity |  |
| Bauschlosser | 0.62% | Building locksmith | Metallbauer | strong continuity |  |
| Geldschrankschlosser | 0.03% | Safe locksmith | Metallbauer | strong continuity |  |
| Herdschlosser | 0.05% | Hearth fitter | Metallbauer | strong continuity |  |
| Kunstschlosser | 0.04% | Artistic locksmith | Metallbauer | strong continuity |  |
| Wagenschlosser | 0.00% | Cartwright | Metallbauer | strong continuity |  |
| Maschinenschlosser | 0.10% | Machinist | Metallbauer | strong continuity |  |
| Eisendreher | 0.00% | Iron turner | Metallbauer | strong continuity |  |
| Schmiede (Nicht-Spezialisten) | 5.47% | Smithy (non specialist) | Metallbauer | strong continuity |  |
| Achsenschmiede | 0.03% | Axle smithy | Metallbauer | strong continuity |  |
| Ankerschmiede | 0.05% | Anchor smithy | Metallbauer | strong continuity |  |
| Faconschmiede | 0.00% | Facon smithy | Metallbauer | strong continuity |  |
| Hufschmiede | 1.40% | Farrier | Metallbauer | strong continuity |  |
| Kettenschmiede | 0.01% | Chain smithy | Metallbauer | strong continuity |  |
| Messerschmiede | 0.19% | Knive forge | Metallbauer | strong continuity |  |
| Sensenschmiede | 0.00% | Scythe forge | Landmaschinenmechaniker | continuity | 0.66% |
| Werkzeugschlosser | 0.01% | Tool maker | Feinwerkmechaniker | continuity | 2.19% |
| Zeug-, Werk-, Bohr-, Zirkelschmiede | 0.11% | Stuff/work/drill/compass forge | Feinwerkmechaniker | continuity |  |
| Schneider | 7.95% | Tailor | Maßschneider; Änderungsschneider | continuity | 0.35% |
| Schornsteinfeger | 0.38% | Chimney Sweep | Schornsteinfeger | strong continuity | 1.36% |
| Schreiner (Tischler) (Nicht-Spez.) | 6.25% | Joiner (non specialist) | Tischler | strong continuity | 5.35% |
| Bautischler | 1.22% | Carpenter | Tischler | strong continuity |  |
| Galanterietischler | 0.00% | Gallantry carpenter | Tischler | strong continuity |  |
| Kistenmacher | 0.04% | Box maker | Tischler | strong continuity |  |
| Kunsttischler | 0.03% | Cabinetmaker | Tischler | strong continuity |  |
| Laubschreiner | 0.01% | Foliage carpenter | Tischler | strong continuity |  |
| Modellschreiner | 0.03% | Model carpenter | Tischler | strong continuity |  |
| Möbeltischler | 0.87% | Furniture maker | Tischler | strong continuity |  |
| Sargmacher | 0.06% | Coffin maker | Tischler | strong continuity |  |
| Stuhlmacher | 0.06% | Chairmaker | Tischler | strong continuity |  |
| Webstuhlbauer | 0.00% | Loom builder | Tischler | strong continuity |  |
| Werkzeugtischler | 0.01% | Tool carpenter | Tischler | strong continuity |  |
| Parket-, Stab-, Patentboden-Tischler | 0.00% | Parquet, rod, patent floor carpenter | Estrichleger | strong continuity | 0.67% |
| Parket-, Stab-, Patentboden-Tischler |  | Parquet, rod, patent floor carpenter | Parketleger | strong continuity | 0.82% |
| Schuhmacher | 9.89% | Shoemaker | Schuhmacher | strong continuity | 0.20% |
| Seifensieder | 0.10% | Soap boiler |  | strong continuity | 0.00% |
| Seiler | 0.32% | Rope maker | Seiler | strong continuity | 0.01% |
| Siebmacher | 0.04% | Sieve maker |  | obsolete | 0.00% |
| Sporer; Büchsenmacher | 0.12% | Gunsmith | Büchsenmacher | continuity | 0.05% |
| Sonnen- und Regenschirmmacher | 0.06% | Umbrella maker | Schirmmacher | continuity | 0.00% |
| Spielwaarenverfertiger | 0.01% | Toy maker | Drechsler (Elfenbeinschnitzer) und Holzspielzeugmacher | strong continuity | 0.09% |
| Steinmetze | 0.65% | Stonemason | Steinmetzen und Steinbildhauer | strong continuity | 0.79% |
| Steinsetzer | 0.21% | Stone setter | Straßenbauer | continuity | 1.06% |
|  |  |  | Fliesen-, Platten- und Mosaiklege | strong continuity | 6.72% |
|  |  |  | Betonstein- und Terrazzohersteller | strong continuity | 0.09% |
| Stricker; Wirker | 0.26% | Knitter | Textilgestalter (Sticker, Weber, Klöppler, Posamentierer, Stricker) | continuity | 0.06% |
| Tuchmacher | 0.30% | Clothier | Textilgestalter (Sticker, Weber, Klöppler, Posamentierer, Stricker) | continuity |  |
| Weber | 3.24% | Weaver | Textilgestalter (Sticker, Weber, Klöppler, Posamentierer, Stricker) | continuity |  |
| Stuckateure | 0.25% | Plasterer | Stukkateure | strong continuity | 0.85% |
| Tapezierer | 0.57% | Paperhanger | Raumausstatter | continuity | 9.12% |
| Töpfer | 0.63% | Potter | Keramiker | strong continuity | 0.07% |
| Uhrmacher | 0.85% | Clockmaker | Uhrmacher | strong continuity | 0.30% |
| Vergolder | 0.08% | Gilder | Vergolder | strong continuity | 0.02% |
| Verfertiger grober Holzwaaren | 0.37% | Manufacturer of coarse wood products | Tischler | strong continuity |  |
| Wagner (Stellmacher) | 2.84% | Cartwright |  | obsolete | 0.00% |
| Zimmerer | 2.15% | Carpenter | Zimmerer | strong continuity | 2.48% |
| SUM | 100.00% |  |  |  | **76.42%** |
